# Supplementary material for: Clinical Manifestations and Molecular Diagnosis of Scrub Typhus and Murine Typhus, Vietnam, 2015–2017
Source: PubMed Central journal article supplement (PMC6433017; doi:10.3201/eid2504.180691), 2019-04
Supplement: 18-0691-Techapp-s1.pdf [file 18-0691-Techapp-s1.pdf]

# Clinical Manifestations and Molecular Diagnosis of Scrub Typhus and Murine Typhus, Vietnam, 2015–2017

## Appendix

**Appendix Table 1.** Demographic, clinical manifestations, and laboratory results for 185 patients with suspected rickettsial disease who tested negative with qPCR, 35 with eschar and 150 without eschar, northern Vietnam, 2015–2017\*

| Age (mean ± SD)                                                        | Total qPCR<br>48 (34–59) | Eschar-, qPCR-<br>47.5 (34–59) | Eschar+, qPCR-<br>50 (38–65) | p value†      |
|------------------------------------------------------------------------|--------------------------|--------------------------------|------------------------------|---------------|
| <b>Demographic</b>                                                     |                          |                                |                              |               |
| Male sex                                                               | 101 (54.6)               | 83 (55.3)                      | 18 (51.3)                    | 0.676§        |
| Living in Hanoi                                                        | 77 (41.6)                | 66 (44.0)                      | 24 (68.6)                    | 0.174§        |
| Living in rural areas                                                  | 100 (54.1)               | 76 (50.7)                      | 2 (20.0)                     | 0.056§        |
| Summer (April–August)                                                  | 143 (77.3)               | 120 (80.0)                     | 23 (65.7)                    | 0.069§        |
| High-exposure (farmer)                                                 | 68 (36.8)                | 52 (34.7)                      | 16 (45.7)                    | 0.222§        |
| Treatment in previous hospitals                                        | 122 (66.0)               | 96 (64.0)                      | 26 (74.3)                    | 0.248§        |
| Prior antimicrobial drug treatment, n = 176                            | 49 (27.8)                | 30 (21.0)                      | 19 (57.6)                    | <b>0</b>      |
| <b>Sign and symptoms onset</b>                                         |                          |                                |                              |               |
| Fever, n = 184                                                         | 184 (100)                | 149 (100)                      | 35 (100)                     | –             |
| Headache                                                               | 140 (75.7)               | 109 (72.7)                     | 31 (88.6)                    | <b>0.025</b>  |
| Myalgia                                                                | 102 (55.1)               | 76 (50.7)                      | 26 (74.3)                    | <b>0.007</b>  |
| Retro-orbital pain                                                     | 21 (11.4)                | 12 (8.0)                       | 9 (25.7)                     | <b>0.003</b>  |
| Sore throat, n = 184                                                   | 13 (11.5)                | 13 (12.6)                      | 0 (0.0)                      | 1.000         |
| Cough                                                                  | 67 (36.2)                | 55 (36.7)                      | 12 (34.3)                    | 0.876         |
| Nausea                                                                 | 30 (16.2)                | 19 (12.7)                      | 11 (31.4)                    | <b>0.005</b>  |
| Vomiting                                                               | 24 (13.0)                | 17 (11.3)                      | 7 (20.0)                     | 0.203         |
| Abdominal pain                                                         | 15 (8.1)                 | 14 (9.3)                       | 1 (2.9)                      | 0.547         |
| Diarrhea, n = 184                                                      | 25 (13.6)                | 20 (13.4)                      | 5 (14.3)                     | 1.0           |
| <b>Physical signs</b>                                                  |                          |                                |                              |               |
| Congested skin, n = 184                                                | 107 (58.2)               | 78 (52.4)                      | 29 (82.7)                    | <b>0.001§</b> |
| Conjunctivitis                                                         | 75 (40.5)                | 59 (39.3)                      | 16 (45.7)                    | 0.489§        |
| Rash                                                                   | 31 (16.8)                | 24 (16.0)                      | 7 (20.0)                     | 0.749         |
| Lymphadenopathy                                                        | 15 (8.1)                 | 10 (6.7)                       | 5 (14.3)                     | 0.166         |
| Hepatomegaly                                                           | 11 (9.7)                 | 10 (9.7)                       | 1 (10.0)                     | 0.597         |
| Splenomegaly, n = 184                                                  | 6 (3.3)                  | 6 (4.0)                        | 0 (0.0)                      | 0.487         |
| Edema                                                                  | 11 (6.0)                 | 6 (4.0)                        | 5 (14.3)                     | <b>0.03</b>   |
| Rales                                                                  | 27 (14.6)                | 22 (14.7)                      | 5 (14.3)                     | 0.954§        |
| Decreased breath sound                                                 | 13 (7.0)                 | 10 (6.7)                       | 3 (8.6)                      | 0.714         |
| Convulsion                                                             | 10 (8.9)                 | 10 (9.7)                       | 0 (0.0)                      | <b>0.043</b>  |
| <b>Laboratory test¶</b>                                                |                          |                                |                              |               |
| Erythrocyte (T/L), median (P <sub>25</sub> –P <sub>75</sub> ), n = 184 | 4.24 (3.67–4.74)         | 4.24 (3.98–4.74)               | 4.24 (3.83–4.71)             | 0.989‡        |
| Leukocyte (g/L), median (P <sub>25</sub> –P <sub>75</sub> ), n = 184   | 8.77 (5.81–11.3)         | 8.51 (6.1–11.3)                | 9 (5.1–12.6)                 | 0.849‡        |
| Platelet (g/L), median (P <sub>25</sub> –P <sub>75</sub> ), n = 184    | 178.5 (103.5–250.5)      | 191 (116–257)                  | 144 (79–193)                 | <b>0.009‡</b> |
| Platelet <100 g/L, n = 184                                             | 44 (23.9)                | 29 (19.5)                      | 15 (42.9)                    | <b>0.004§</b> |
| ALT >40 IU/L, n = 175                                                  | 126 (72.0)               | 101 (70.1)                     | 25 (80.7)                    | 0.237§        |
| AST >37 IU/L, n = 179                                                  | 128 (71.5)               | 100 (69.0)                     | 28 (82.4)                    | 0.120§        |
| Total bilirubin >17 μmol/L, n = 85                                     | 21 (24.7)                | 17 (22.7)                      | 4 (40.0)                     | 0.254         |
| Albumin <32 g/L, n = 107                                               | 78 (72.9)                | 66 (76.7)                      | 12 (57.1)                    | <b>0.07§</b>  |
| Creatinine >120 μmol/L, n = 179                                        | 18 (10.1)                | 15 (10.3)                      | 3 (8.8)                      | 0.791§        |
| PCT >0.25 ng/mL, n = 166                                               | 105 (63.3)               | 79 (58.1)                      | 26 (86.7)                    | <b>0.003§</b> |
| CRP >12 mg/L, n = 156                                                  | 127 (81.4)               | 105 (80.2)                     | 22 (88.0)                    | 0.574         |
| <b>Treatment and result</b>                                            |                          |                                |                              |               |
| Doxycycline, n = 181                                                   | 115 (63.5)               | 91 (61.9)                      | 24 (70.6)                    | <b>0.003</b>  |
| Chloramphenicol, n = 181                                               | 6 (3.3)                  | 4 (2.7)                        | 2 (5.9)                      | <b>0.003</b>  |
| Doxycycline and chloramphenicol, n = 181                               | 10 (5.5)                 | 5 (3.4)                        | 5 (14.7)                     | <b>0.003</b>  |
| Albumin transfusion, n = 183                                           | 12 (6.6)                 | 8 (5.4)                        | 4 (11.4)                     | 0.248         |
| Respiratory support, n = 184                                           | 20 (10.9)                | 11 (7.4)                       | 9 (24.7)                     | 0.003         |

|                                                                                     | Total qPCR | Eschar-, qPCR- | Eschar+, qPCR- | p value†     |
|-------------------------------------------------------------------------------------|------------|----------------|----------------|--------------|
| Age (mean ± SD)                                                                     | 48 (34–59) | 47.5 (34–59)   | 50 (38 – 65)   | 0.352‡       |
| <b>Outcome</b>                                                                      |            |                |                |              |
| Fever before admission, median days<br>(P <sub>25</sub> –P <sub>75</sub> ), n = 184 | 9 (6–10.5) | 8 (6–10)       | 10 (7–11)      | 0.649‡       |
| Afebrile# ≤72 h after treatment began, n = 68                                       | 37 (50.7)  | 31 (49.2)      | 6 (60.0)       | 0.248        |
| Median days to afebrile (P <sub>25</sub> –P <sub>75</sub> ), n = 68                 | 4 (3–5)    | 4 (3–5)        | 3 (2–4)        | 0.064‡       |
| Median no. days in hospital (P <sub>25</sub> –P <sub>75</sub> )                     | 7 (5–10)   | 7 (5–10)       | 7 (5–10)       | 0.849‡       |
| Death and palliative discharge                                                      | 5 (2.7)    | 2 (1.3)        | 3 (8.6)        | <b>0.048</b> |

\*Values relate to 185 patients and no. (%), except where otherwise indicated. P<sub>25</sub>–P<sub>75</sub>, 25th–75th percentile. Bold text indicates statistical significance.

†Calculated using Fisher exact test, except where noted.

‡Calculated using Mann-Whitney test.

§Calculated using  $\chi^2$  test.

¶ALT, alanine aminotransferase; AST, aspartate aminotransferase; CRP, C-reactive protein; PCT procalcitonin.

#No temperature recorded >37.5°C, over a 24-h period.

**Appendix Table 2.** Comparison of demographic, clinical manifestations, and laboratory results for 138 patients with suspected scrub typhus, northern Vietnam, 2015-2017\*

|                                                                         | Scrub typhus+     |                  | Scrub typhus-    |               |
|-------------------------------------------------------------------------|-------------------|------------------|------------------|---------------|
|                                                                         | Eschar+, qPCR-    | qPCR+            | Eschar+, qPCR-   | p value†      |
| Age (mean ± SD)                                                         | 50.3 ± 16.7       | 50.2 ± 16.5      | 50.6 ± 17.6      | 0.918‡        |
| <b>Demographic</b>                                                      |                   |                  |                  |               |
| Male sex                                                                | 64 (46.4)         | 46 (44.7)        | 18 (51.4)        | 0.448§        |
| Living in Hanoi Province                                                | 45 (32.6)         | 34 (33.0)        | 11 (31.4)        | 0.863§        |
| Living in rural area                                                    | 90 (65.2)         | 66 (64.1)        | 24 (68.6)        | 0.630§        |
| Summer (April–August)                                                   | 95 (68.8)         | 72 (69.9)        | 23 (65.7)        | 0.644§        |
| High-exposure (farmer)                                                  | 68 (49.3)         | 52 (50.5)        | 16 (45.7)        | 0.626§        |
| Treatment in previous hospitals                                         | 100 (72.5)        | 74 (71.8)        | 26 (74.3)        | 0.780§        |
| Prior antimicrobial drug treatment, n = 130                             | 51 (39.2)         | 32 (33.0)        | 19 (57.6)        | <b>0.043§</b> |
| <b>Symptoms</b>                                                         |                   |                  |                  |               |
| Fever                                                                   | 136 (98.6)        | 102 (99.0)       | 34 (1.0)         | 0.444         |
| Headache                                                                | 112 (81.2)        | 81 (78.6)        | 31 (88.6)        | 0.175         |
| Myalgia                                                                 | 99 (71.7)         | 73 (70.9)        | 26 (74.3)        | 0.525         |
| Retro-orbital pain                                                      | 27 (19.6)         | 18 (17.5)        | 9 (25.7)         | 0.482         |
| Sore throat                                                             | 17 (12.4)         | 13 (12.6)        | 4 (11.8)         | 0.531         |
| Cough                                                                   | 50 (36.2)         | 38 (36.9)        | 12 (34.3)        | 0.911         |
| Nausea                                                                  | 39 (28.3)         | 28 (27.2)        | 11 (31.4)        | 0.858§        |
| Vomiting, n = 137                                                       | 28 (20.4)         | 21 (20.6)        | 7 (20.0)         | 1.0           |
| Abdominal pain, n = 137                                                 | 13 (9.5)          | 12 (11.8)        | 1 (2.9)          | 0.104         |
| Diarrhea                                                                | 20 (14.5)         | 15 (14.6)        | 5 (14.3)         | 0.648         |
| <b>Physical signs</b>                                                   |                   |                  |                  |               |
| Congested skin                                                          | 111 (80.4)        | 82 (79.6)        | 29 (82.7)        | 0.676§        |
| Conjunctivitis                                                          | 82 (59.4)         | 66 (64.1)        | 16 (45.7)        | 0.056§        |
| Eschar                                                                  | 90 (65.2)         | 55 (53.4)        | 35 (100)         | <b>0§</b>     |
| Rash                                                                    | 42 (30.4)         | 35 (34.0)        | 7 (20.0)         | 0.144         |
| Lymphadenopathy                                                         | 0 (0.0)           | 19 (18.6)        | 0 (0.0)          | 0.359         |
| Hepatomegaly                                                            | 15 (10.9)         | 10 (9.7)         | 5 (14.3)         | 0.530         |
| Splenomegaly                                                            | 6 (4.4)           | 6 (5.8)          | 0 (0.0)          | 0.337         |
| Edema                                                                   | 18 (13.0)         | 13 (12.7)        | 5 (14.3)         | 0.777         |
| Rales                                                                   | 27 (19.6)         | 22 (21.4)        | 5 (14.3)         | 0.362§        |
| Decreased breath sound, n = 137                                         | 19 (13.9)         | 16 (15.7)        | 3 (8.6)          | 0.400         |
| Convulsion                                                              | 14 (10.1)         | 10 (9.7)         | 4 (11.4)         | 0.752         |
| <b>Laboratory test¶</b>                                                 |                   |                  |                  |               |
| Erythrocyte (T/L), median (P <sub>25</sub> –P <sub>75</sub> )           | 4.25 (3.86–4.7)   | 4.25 (3.86–4.69) | 4.24 (3.83–4.71) | 0.760#        |
| Leukocyte (g/L), median (P <sub>25</sub> –P <sub>75</sub> )             | 9.05 (6.42–11.17) | 9.1 (6.62–11.17) | 9 (5.1–12.6)     | 0.828#        |
| Platelet (g/L), median (P <sub>25</sub> –P <sub>75</sub> )              | 129 (66–193)      | 128 (65–194)     | 144 (79–193)     | 0.701#        |
| Platelet (g/L) <100 g/L                                                 | 58 (42.0)         | 43 (41.8)        | 15 (42.9)        | 0.909§        |
| ALT >40 IU/L, n = 133                                                   | 116 (87.2)        | 91 (89.2)        | 25 (80.7)        | 0.226         |
| AST >37 IU/L, n = 136                                                   | 123 (90.4)        | 95 (93.4)        | 28 (82.4)        | 0.089         |
| Total bilirubin >17 μmol/L, n = 70                                      | 28 (40.0)         | 24 (40.0)        | 4 (40.0)         | 1.0           |
| Albumin <32 g/L, n = 92                                                 | 39 (49.4)         | 36 (50.7)        | 3 (37.5)         | 0.527§        |
| Creatinine >120 μmol/L, n = 135                                         | 18 (13.3)         | 15 (14.9)        | 3 (8.8)          | 0.561         |
| PCT >0.25 ng/mL, n = 119                                                | 95 (79.8)         | 69 (77.5)        | 26 (86.7)        | 0.281§        |
| CRP >12 mg/L, n = 108                                                   | 97 (89.8)         | 75 (90.4)        | 22 (88.0)        | 0.714         |
| <b>Treatment and result</b>                                             |                   |                  |                  |               |
| Doxycycline, n = 136                                                    | 87 (64.0)         | 63 (61.2)        | 24 (70.6)        | 0.285         |
| Chloramphenicol, n = 136                                                | 4 (2.9)           | 2 (2.0)          | 2 (5.9)          | 0.285         |
| Doxycycline and chloramphenicol, n = 136                                | 33 (24.3)         | 28 (27.2)        | 5 (14.7)         | 0.285         |
| Albumin transfusion, n = 136                                            | 16 (11.9)         | 12 (12.0)        | 4 (11.8)         | 1.0           |
| Respiratory support, n = 136                                            | 36 (26.5)         | 27 (26.7)        | 9 (25.7)         | 0.906§        |
| <b>Outcome</b>                                                          |                   |                  |                  |               |
| Fever before admission, median days (P <sub>25</sub> –P <sub>75</sub> ) | 9 (7–11)          | 9 (7–11)         | 10 (7–11)        | 0.908#        |
| Afebrile** ≤72 h after treatment began, n = 78                          | 40 (51.3)         | 31 (49.2)        | 9 (60.0)         | 0.452§        |
| Median days to afebrile (P <sub>25</sub> –P <sub>75</sub> ), n = 78     | 3 (2–5)           | 4 (3–5)          | 3 (2–4)          | 0.097#        |
| Median no. days in hospital (P <sub>25</sub> –P <sub>75</sub> )         | 7 (5–10)          | 7 (5–10)         | 7 (5–10)         | 0.945#        |
| Death and Palliative discharge                                          | 8 (5.8)           | 5 (4.9)          | 3 (8.6)          | 0.418         |

\*Values relate to 138 patients (103 patients with confirmed scrub typhus, eschars, and positive qPCR; 35 patients with negative qPCR eschar) and no. (%), except where otherwise indicated. P<sub>25</sub>–P<sub>75</sub>, 25th–75th percentile. Bold text indicates statistical significance.

†Calculated using Fisher exact test, except where noted.

‡Calculated using the analysis of variance test.

§Calculated using  $\chi^2$  test.

¶ALT, alanine aminotransferase; AST, aspartate aminotransferase; CRP, C-reactive protein; PCT procalcitonin.

#Calculated using Mann-Whitney test.

\*\*No temperature recorded >37.5°C, over a 24-h period.

**Appendix Table 3.** Clinical manifestations and laboratory results for 253 patients, 103 with qPCR-confirmed (qPCR+) scrub typhus and 150 with eschar-negative, qPCR-negative (eschar-, qPCR-) results, northern Vietnam, 2015-2017\*

| Category                                                               | Scrub Typhus<br>eschar-, qPCR- | Scrub Typhus     | Eschar-, qPCR-   | p value†      |
|------------------------------------------------------------------------|--------------------------------|------------------|------------------|---------------|
| <b>Symptoms onset</b>                                                  |                                |                  |                  |               |
| Fever, n = 252                                                         | 252 (100)                      | 102 (99.0)       | 149 (100)        | 0.407         |
| Headache                                                               | 190 (75.1)                     | 81 (78.6)        | 109 (72.7)       | 0.467         |
| Myalgia                                                                | 149 (58.9)                     | 73 (70.9)        | 76 (50.7)        | <b>0.002</b>  |
| Retro-orbital pain, n = 113                                            | 30 (11.9)                      | 18 (17.5)        | 12 (8.0)         | <b>0‡</b>     |
| Sore throat                                                            | 30 (11.9)                      | 13 (12.6)        | 17 (11.3)        | 0.139         |
| Cough                                                                  | 93 (36.8)                      | 38 (36.9)        | 55 (36.7)        | 0.720         |
| Nausea                                                                 | 47 (18.6)                      | 28 (27.2)        | 19 (12.7)        | <b>0.002</b>  |
| Vomiting, n = 252                                                      | 38 (15.1)                      | 21 (20.6)        | 17 (13.1)        | <b>0.023</b>  |
| Abdominal pain, n = 252                                                | 26 (10.3)                      | 12 (11.8)        | 14 (9.3)         | 0.097         |
| Diarrhea, n = 252                                                      | 35 (13.9)                      | 15 (14.6)        | 13 (14.2)        | 0.236         |
| <b>Physical signs</b>                                                  |                                |                  |                  |               |
| Congested skin, n = 252                                                | 160 (63.5)                     | 82 (79.6)        | 78 (52.4)        | <b>0‡</b>     |
| Conjunctivitis                                                         | 149 (49.4)                     | 66 (64.1)        | 59 (39.3)        | <b>0‡</b>     |
| Eschar                                                                 | 55 (21.7)                      | 55 (53.4)        | 0 (0.0)          | <b>0‡</b>     |
| Rash                                                                   | 59 (23.3)                      | 35 (34.0)        | 24 (16.0)        | <b>0.001</b>  |
| Lymphadenopathy, n = 251                                               | 25 (10.0)                      | 19 (18.6)        | 6 (4.0)          | <b>0‡</b>     |
| Hepatomegaly                                                           | 20 (7.9)                       | 10 (9.7)         | 10 (6.7)         | 0.378‡        |
| Splenomegaly                                                           | 12 (4.8)                       | 6 (5.8)          | 6 (4.3)          | 0.556         |
| Edema                                                                  | 19 (7.5)                       | 13 (12.7)        | 6 (4.0)          | <b>0.011‡</b> |
| Rales                                                                  | 44 (17.39)                     | 22 (21.4)        | 22 (14.67)       | 0.168‡        |
| Decreased breath sound, n = 252                                        | 26 (10.3)                      | 16 (15.7)        | 10 (6.7)         | <b>0.021‡</b> |
| Convulsion                                                             | 14 (5.5)                       | 10 (9.7)         | 4 (2.7)          | <b>0.016‡</b> |
| <b>Laboratory test§</b>                                                |                                |                  |                  |               |
| Erythrocyte (T/L), median (P <sub>25</sub> -P <sub>75</sub> ), n = 252 | 4.25 (3.95-4.73)               | 4.25 (3.86-4.69) | 4.24 (3.98-4.74) | 0.589¶        |
| Leukocyte (g/L), median (P <sub>25</sub> -P <sub>75</sub> ), n = 252   | 8.72 (6.32-11.19)              | 9.1 (6.62-11.17) | 9.1 (6.1-11.3)   | 0.455¶        |
| Platelet (g/L), median (P <sub>25</sub> -P <sub>75</sub> ), n = 252    | 163 (86.9-244)                 | 128 (65-194)     | 191 (116-257)    | <b>0¶</b>     |
| Platelet <100 (g/L), n = 252                                           | 49 (43.4)                      | 43 (41.8)        | 6 (0.0)          | 0.070‡        |
| ALT >40 IU/L, n = 246                                                  | 192 (78.1)                     | 91 (89.2)        | 101 (70.1)       | <b>0‡</b>     |
| AST >37 IU/L, n = 247                                                  | 195 (79.0)                     | 95 (93.4)        | 100 (67.0)       | <b>0‡</b>     |
| Total bilirubin >17µmol/L, n = 135                                     | 41 (30.4)                      | 24 (40.0)        | 17 (22.7)        | <b>0.030‡</b> |
| Albumin <32 g/L, n = 157                                               | 56 (35.7)                      | 36 (50.7)        | 20 (23.3)        | <b>0‡</b>     |
| Creatinine >120µmol/L, n = 111                                         | 30 (12.2)                      | 15 (14.9)        | 15 (10.3)        | 0.288‡        |
| PCT >0.25 ng/mL, n = 225                                               | 148 (65.8)                     | 69 (77.5)        | 79 (58.1)        | <b>0.003‡</b> |
| CRP >10 mg/L, n = 214                                                  | 180 (84.1)                     | 75 (90.4)        | 105 (80.2)       | <b>0.047‡</b> |

\*Values relate to 253 patients and no. (%), except where otherwise indicated. P<sub>25</sub>-P<sub>75</sub>, 25th-75th percentile. Bold text indicates statistical significance.

†Calculated using Fisher exact test, except where noted.

‡Calculated using  $\chi^2$  test.

§ALT, alanine aminotransferase; AST, aspartate aminotransferase; CRP, C-reactive protein; PCT procalcitonin.

¶Calculated using Mann-Whitney test.

**Appendix Table 4.** Comparison of demographic, clinical manifestations, and laboratory results for 103 patients with scrub typhus from Hanoi Province (n = 34) and other provinces (n = 69), northern Vietnam, 2015-2017\*

|                                                                          | All scrub typhus cases |             |                 | p value† |
|--------------------------------------------------------------------------|------------------------|-------------|-----------------|----------|
|                                                                          | All scrub typhus cases | Hanoi       | Other Provinces |          |
| Age, y (mean ± SD)                                                       | 50.2 ± 16.5            | 52.2 ± 15.3 | 49.2 ± 17.1     | 0.390‡   |
| Transferred from other hospitals or clinics                              | 74 (71.8)              | 16 (47.1)   | 58 (84.1)       | 0§       |
| Antimicrobial drug treatment before admission, n = 97                    | 32 (33.0)              | 6 (20.0)    | 26 (38.8)       | 0.143§   |
| <b>Signs and symptoms</b>                                                |                        |             |                 |          |
| Headache                                                                 | 81 (78.6)              | 26 (76.5)   | 55 (79.7)       | 0.459    |
| Myalgia                                                                  | 73 (70.9)              | 24 (70.6)   | 49 (71.0)       | 1.0      |
| Retro-orbital-pain                                                       | 18 (17.5)              | 8 (23.5)    | 10 (14.5)       | 0.338§   |
| Sore throat                                                              | 13 (12.6)              | 4 (11.8)    | 9 (13.0)        | 1.0      |
| Cough                                                                    | 38 (36.9)              | 10 (29.4)   | 28 (40.5)       | 0.402    |
| Nausea                                                                   | 28 (27.2)              | 8 (23.5)    | 20 (29.0)       | 0.702    |
| Vomiting                                                                 | 21 (20.6)              | 5 (14.7)    | 16 (23.5)       | 0.535    |
| Abdominal pain                                                           | 12 (11.8)              | 3 (8.8)     | 9 (13.2)        | 0.914    |
| <b>Physical signs</b>                                                    |                        |             |                 |          |
| Congested skin                                                           | 82 (79.6)              | 26 (76.5)   | 56 (81.2)       | 0.579§   |
| Conjunctivitis                                                           | 66 (64.1)              | 22 (64.7)   | 44 (63.8)       | 0.926§   |
| Eschar                                                                   | 55 (53.4)              | 17 (50.0)   | 38 (55.1)       | 0.627§   |
| Rash                                                                     | 35 (34.0)              | 11 (32.4)   | 24 (34.8)       | 0.930    |
| Lymphadenopathy, n = 102                                                 | 18 (17.7)              | 3 (8.8)     | 15 (22.1)       | 0.136    |
| Hepatomegaly                                                             | 10 (9.7)               | 1 (2.9)     | 9 (13.0)        | 0.159    |
| Splenomegaly                                                             | 6 (5.8)                | 1 (2.9)     | 5 (7.3)         | 0.661    |
| Edema                                                                    | 13 (12.6)              | 2 (5.9)     | 11 (15.9)       | 0.211    |
| Rales                                                                    | 22 (21.4)              | 7 (20.6)    | 15 (21.7)       | 0.893§   |
| Decreased breath sound, n = 102                                          | 16 (15.7)              | 4 (11.8)    | 12 (17.7)       | 0.441§   |
| Convulsion                                                               | 10 (9.7)               | 3 (8.8)     | 7 (10.1)        | 1.0      |
| <b>Laboratory test¶</b>                                                  |                        |             |                 |          |
| Platelet <100 g/L                                                        | 43 (41.8)              | 14 (41.2)   | 29 (42.0)       | 0.934§   |
| ALT >40 IU/L, n = 102                                                    | 91 (89.2)              | 31 (93.9)   | 60 (87.0)       | 0.496    |
| AST >37 IU/L, n = 102                                                    | 95 (93.1)              | 31 (93.4)   | 69 (92.8)       | 1.0      |
| Bilirubin Total>17µmol/L, n = 60                                         | 36 (60.0)              | 12 (57.1)   | 24 (61.5)       | 0.740    |
| Albumin <32 g/L, n = 71                                                  | 36 (50.7)              | 10 (40.0)   | 26 (56.5)       | 0.220    |
| Creatinine >120 µmol/L, n = 101                                          | 15 (14.9)              | 3 (9.1)     | 12 (17.7)       | 0.374    |
| PCT >0.25 ng/mL, n = 89                                                  | 69 (77.5)              | 19 (73.1)   | 50 (79.4)       | 0.218§   |
| CRP >12 mg/L, n = 92                                                     | 75 (90.4)              | 25 (83.3)   | 50 (94.3)       | 0.131    |
| <b>Treatment and result</b>                                              |                        |             |                 |          |
| Doxycycline                                                              | 63 (61.2)              | 21 (61.7)   | 42 (60.9)       | 0.634    |
| Chloramphenicol                                                          | 2 (1.9)                | 0 (0.0)     | 2 (2.9)         | 0.634    |
| Doxycycline and chloramphenicol                                          | 28 (27.2)              | 11 (32.4)   | 17 (24.6)       | 0.634    |
| Albumin transfusion, n = 101                                             | 12 (11.9)              | 5 (14.7)    | 7 (10.5)        | 0.532    |
| Respiratory support, n = 101                                             | 27 (26.7)              | 8 (23.5)    | 19 (28.4)       | 0.604§   |
| <b>Outcome</b>                                                           |                        |             |                 |          |
| Fever before admission, median days (P <sub>25</sub> -P <sub>75</sub> )  | 9 (7-11)               | 9 (7-11)    | 9 (7-11)        | 0.783**  |
| Median no. days to afebrile# (P <sub>25</sub> -P <sub>75</sub> ), n = 63 | 4 (3-5)                | 4 (2.5-5.5) | 3 (3-5)         | 0.804**  |
| Median no. days in hospital (P <sub>25</sub> -P <sub>75</sub> )          | 7 (5-10)               | 7 (5-10)    | 7 (5-10)        | 0.797**  |
| Palliative discharge and death                                           | 5 (4.9)                | 1 (2.9)     | 4 (5.8)         | 0.464    |

\*Values relate to 103 patients and no. (%), except where otherwise indicated. P<sub>25</sub>-P<sub>75</sub>, 25th-75th percentile. Bold text indicates statistical significance.

†Calculated using Fisher exact test, except where noted.

‡Calculated using the analysis of variance test.

§Calculated using  $\chi^2$  test.

¶ALT, alanine aminotransferase; AST, aspartate aminotransferase; CRP, C-reactive protein; PCT procalcitonin.

#No temperature recorded >37.5°C, over a 24-h period.

\*\*Calculated using Mann-Whitney test.
